# Supplementary material
Source: Springer Nature journal article supplement (https://www.springermedizin.de/resource/supplementary/12889_2010_2899_MOESM4_ESM.pdf/9487608)

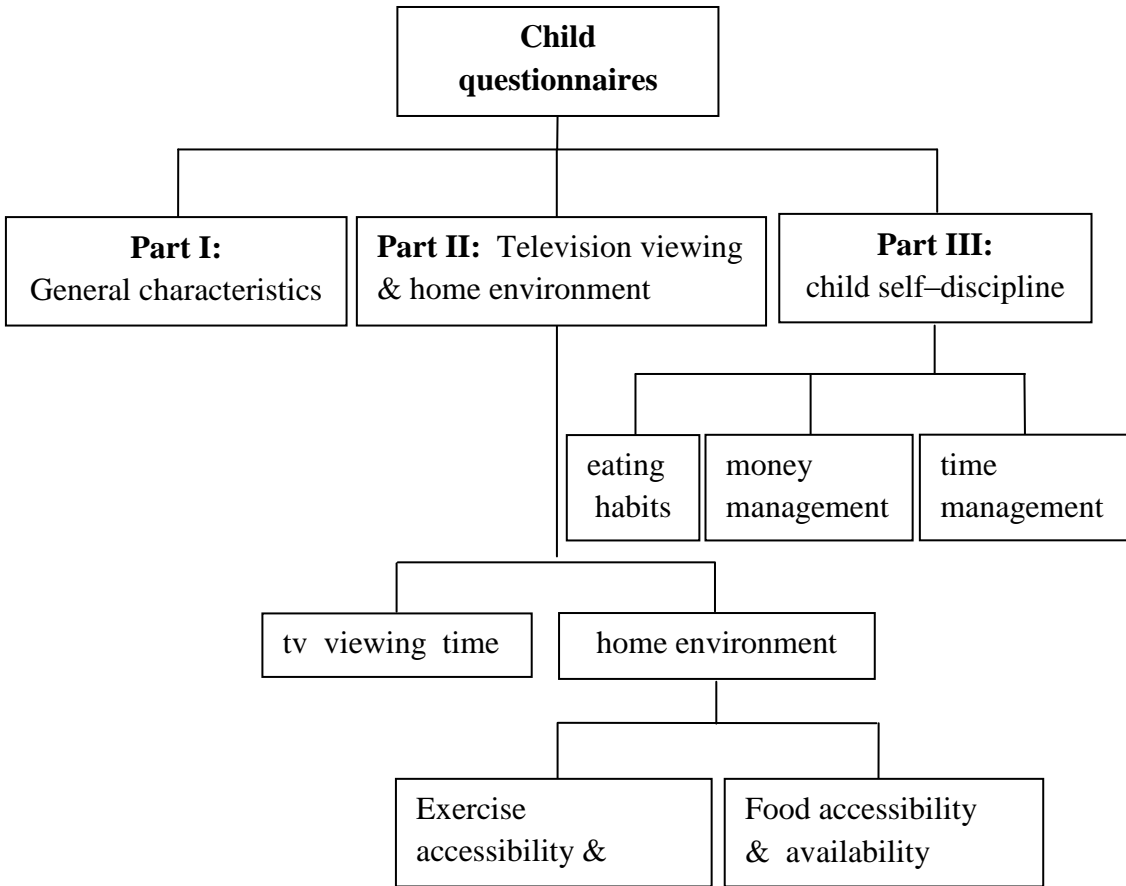

Supplement: MOESM4 [file 9487608]
